# Supplementary material
Source: PubMed Central journal article supplement (PMC6421416)
Supplement: pnas.1813836116.sapp.pdf [file pnas.1813836116.sapp.pdf]

1

2 **Supplementary Information for**  
3 **Simultaneous Bayesian inference of phylogeny and molecular coevolution**

4 **Meyer X., Dib L., Silvestro D. and Salamin N.**

5 **Xavier Meyer.**

6 **E-mail: [xavier.meyer@berkeley.edu](mailto:xavier.meyer@berkeley.edu)**

7 **This PDF file includes:**

8     Supplementary text

9     Figs. S1 to S16

10    Tables S1 to S4

11    References for SI reference citations

## 12 Supporting Information Text

### 13 Efficiently exploring the pairs space ( $k > 0$ ).

14 **Drawing pairs and profiles.** Sampling the parameters  $\rho_k$  representing the sites being coevolving and their profile is extremely  
15 challenging because there is an extremely high number of possible combinations. Indeed, up to  $\frac{N(N-1)}{2}$  different pairs can be  
16 derived from a sequence of  $N$  nucleotides (quadratic growth). Additionally, the profile of coevolution must be sampled for  
17 each of the  $k$  pairs among 192 possible existing profiles. Using uniform proposal to blindly propose parameter values for  $\rho_k$   
18 would thus result in a very inefficient sampler with a high rejection rate for such moves due to the size and complexity of this  
19 parameter space.

20 Instead of using uniform proposal, we construct proposals based on scores representing how likely it is for a pairs of sites  
21 to coevolve. These scores are computed once prior to a MCMC analysis using inexpensive statistical computations. These  
22 computations require that we identify the number of profiles that can be expressed for any given pair of sites  $(i, j)$ . For each  
23 pair and observable profile, we then count the number of observed data in the alignment at sites  $(i, j)$  that are not included in  
24 the profile. For instance given a profile defined by AA and CC, any pairs of nucleotides observed at positions  $i$  and  $j$  of the  
25 alignment other than AA and CC would be considered as conflicting with the profile and thus counted.

26 Using the number of profiles per pair of positions and the number of conflicts per profile, we defined a score  $S(i, j)$  favoring  
27 pairs having few profiles, few conflicts for their best profile and a significant variance in the pairs found that are within the  
28 profile (SI Appendix, Algorithm S1). The first component ( $S1$ ) of the score penalizes pairs of position having many possible  
29 profiles, the second, ( $S2$ ), penalizes pairs showing many conflicts and the last, ( $S3$ ), penalizes co-conserved pairs. All the  
30 components are then scaled such as to fit within the  $[0, 1]$  interval and then weighted for importance.

31 The second score  $R(i, j, \phi)$  rates each observed profile in function of its conflicts count: the less being the best. This score is  
32 normalized and can be used to obtain a discrete probability distribution  $p(\phi|i, j)$  from which profiles  $\phi$  can be independently  
33 drawn. Similarly, the score  $S(\cdot, \cdot)$  is employed to define the probability of a position  $i$ , or pair of positions  $(i, j)$ , given the set of  
34 available independent sites  $S_{indep}$ . We define the probability of drawing a position  $i$  as

$$35 \quad p(i|S_{indep}) = \frac{\max_j(S(i, j))}{\sum_{l \in S_{indep}} \max_j(S(l, j))}. \quad [1]$$

36 Given a position  $A$  and the set of independent sites, we define the conditional probability of drawing a pair containing  $i$  as

$$37 \quad p((i, j)|S_{indep}, i) = \frac{S(i, j)}{\sum_{j \in S_{indep}} S(i, j)}. \quad [2]$$

38 **Frequency of proposals.** In CoevRJ, proposals are randomly selected at each iteration according to a weighted probability  
39 distribution. Transdimensional moves are proposed with frequencies defined as a function of  $k$ . These changes in proposal  
40 probabilities must therefore be accounted for in the acceptance ratio. Frequencies affected by  $k$  are  $f_+(k)$  for the creation of  
41 pairs,  $f_-(k)$  for the deletion,  $f_{swap1}$  for the swap of a pair with an independent position and  $f_{swap2}$  for the swap between two  
42 coevolving pairs.

Swapping moves are applied with a constant frequency  $f_{cst}$  with respect to  $k$ . Proposals moving from  $M_k$  to  $M_{k+1}$  have a  
frequency decreasing as  $k$  increases and given by  $f_+(k) = 0.99 - 0.98 \cdot k/K_{max}$ . The reciprocal proposals moving from  $M_{k+1}$   
to  $M_k$  have a frequency increasing with the number of pairs  $k$ , and is given by  $f_-(k) = 0.1 + 0.98 \cdot k/K_{max}$ . Finally, these  
frequencies must be adapted for the boundary cases and are given by

$$\begin{cases} k = 0 & f_+(k), f_-(k) = f_{swap1} = f_{swap2} = 0 \\ k = 1 & f_+(k), f_-(k), f_{swap1} = f_{cst}, f_{swap2} = 0 \\ k = K_{max} & f_+(k) = 0, f_-(k), f_{swap1} = 0, f_{swap2} = f_{cst} \\ else & f_+(k), f_-(k), f_{swap1} = f_{cst}, f_{swap2} = f_{cst} \end{cases}$$

The probability of applying a proposal  $x$  having frequency  $f_x$  is then defined as

$$Pr(x|k) = \frac{(1 - f_{cst}) \cdot f_x}{f_+(k) + f_-(k) + f_{swap1} + f_{swap2}}$$

43 These frequencies are changing with  $k$  and are not symmetrical when moving through the space of models. Therefore, equation 3  
44 (main article) must account for these probabilities by conditioning the probability of a move defined as  $q(M)$  and  $q(M')$  with  
45 its probability  $Pr(x|k)$ .

46 1. Supplementary figures

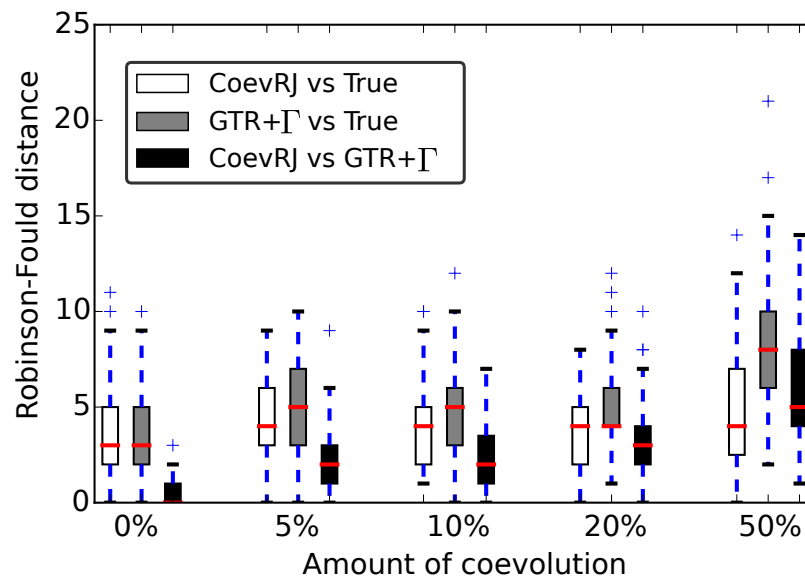

Fig. S1. Robinson-Foulds distances (Robinson & Foulds 1981) between the trees topologies inferred with CoevRJ, GTR+ $\Gamma$  and the one employed for the simulations (True).

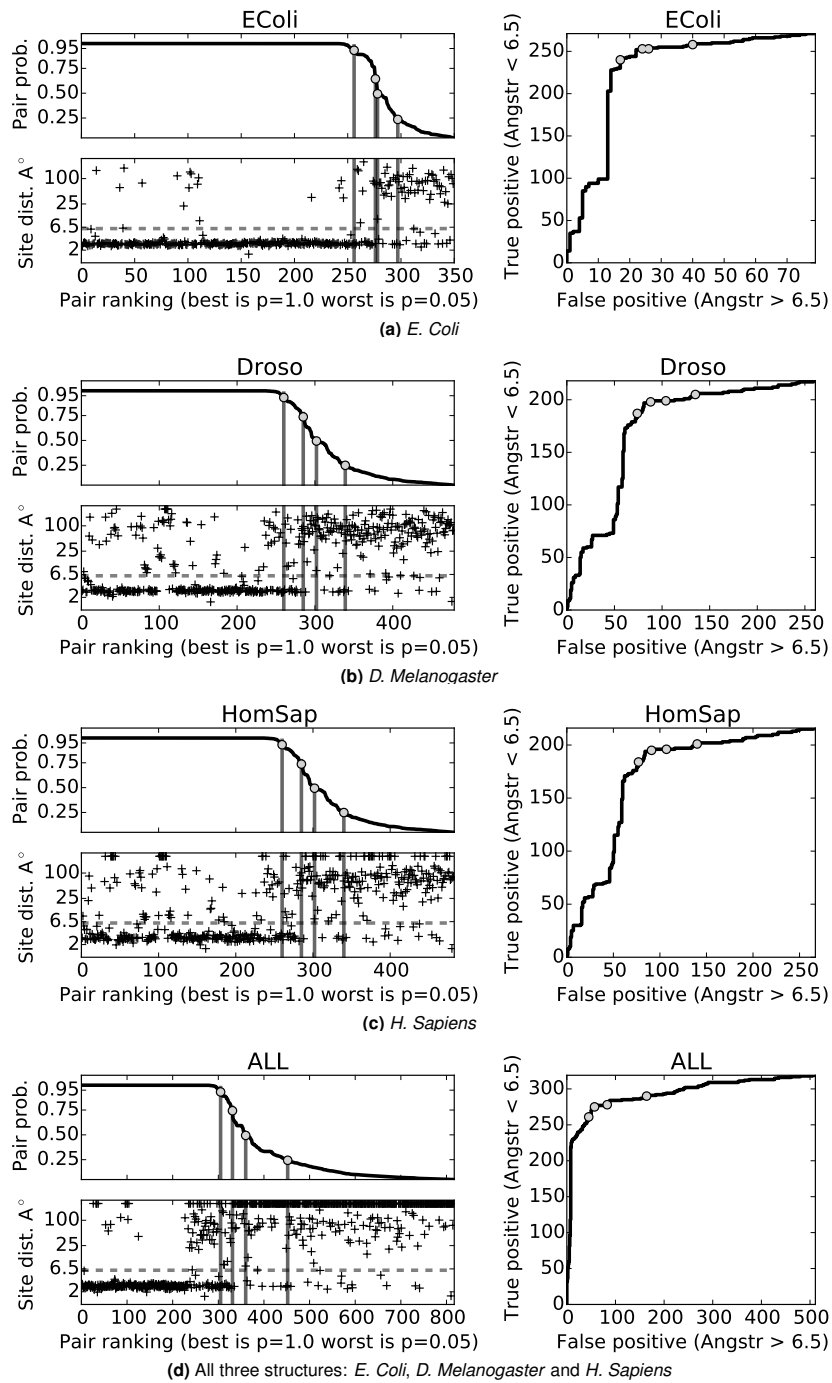

**Fig. S2.** Validation of the pairs predicted as coevolving by CoevRJ on various structures. Only pairs that map on the structure are reported in figure (a), (b) and (c). The left figures reports the pairs probability against distance in the RNA structure. The right figures reports amount of pairs predicted as coevolving but unconfirmed by the structure against the ones confirmed and predicted as coevolving.

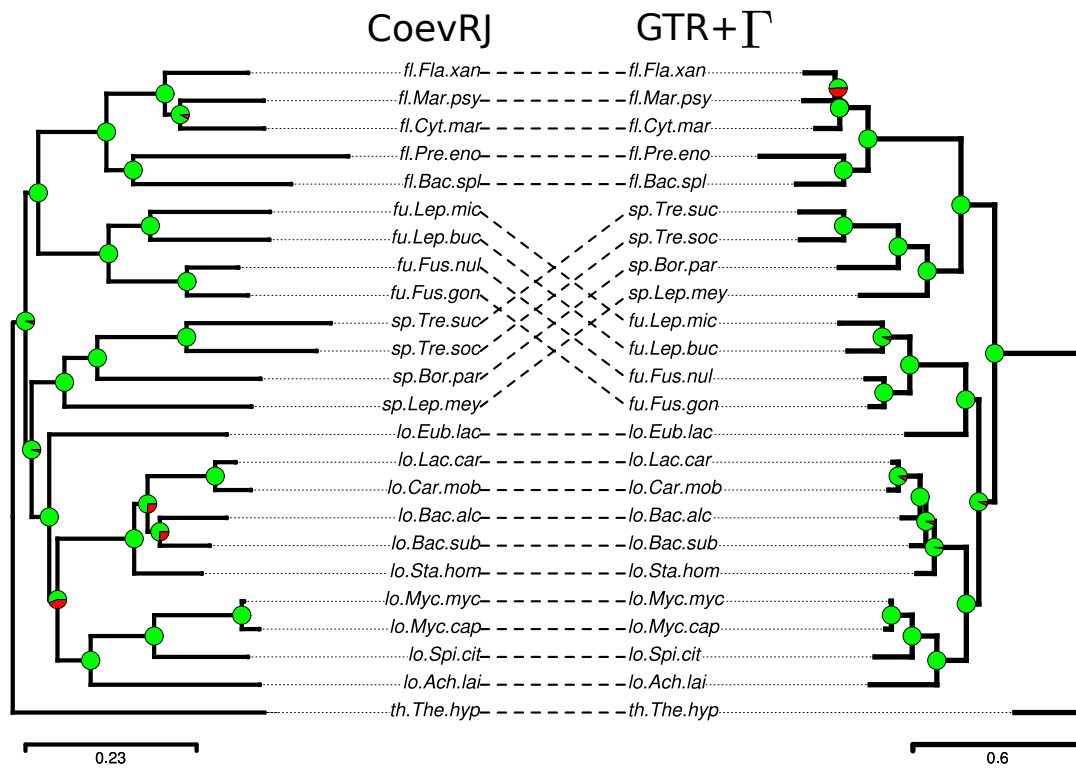

**Fig. S3.** Comparison of the phylogenetic trees inferred with CoevRJ and GTR+Γ for the Flaviobacteria, Fusobacteria, Spirochaetes and Fermenticutes clades. The pie charts represent the inferred probability for each node to be present in the summarized phylogeny: a fully green pie chart identifies a node supported by a probability of 1.

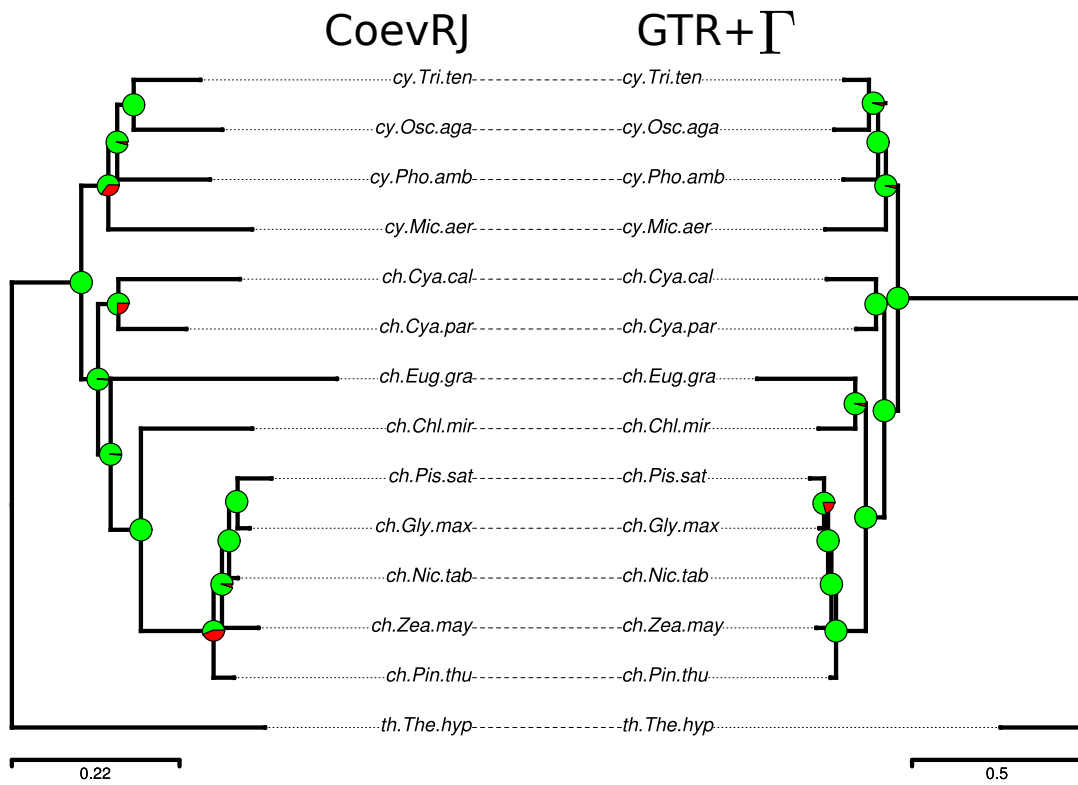

**Fig. S4.** Comparison of the phylogenetic trees inferred with CoevRJ and GTR+ $\Gamma$  for the Cytobacteria and Chloroplast clades. The pie charts represent the inferred probability for each node to be present in the summarized phylogeny: a fully green pie chart identifies a node supported by a probability of 1.

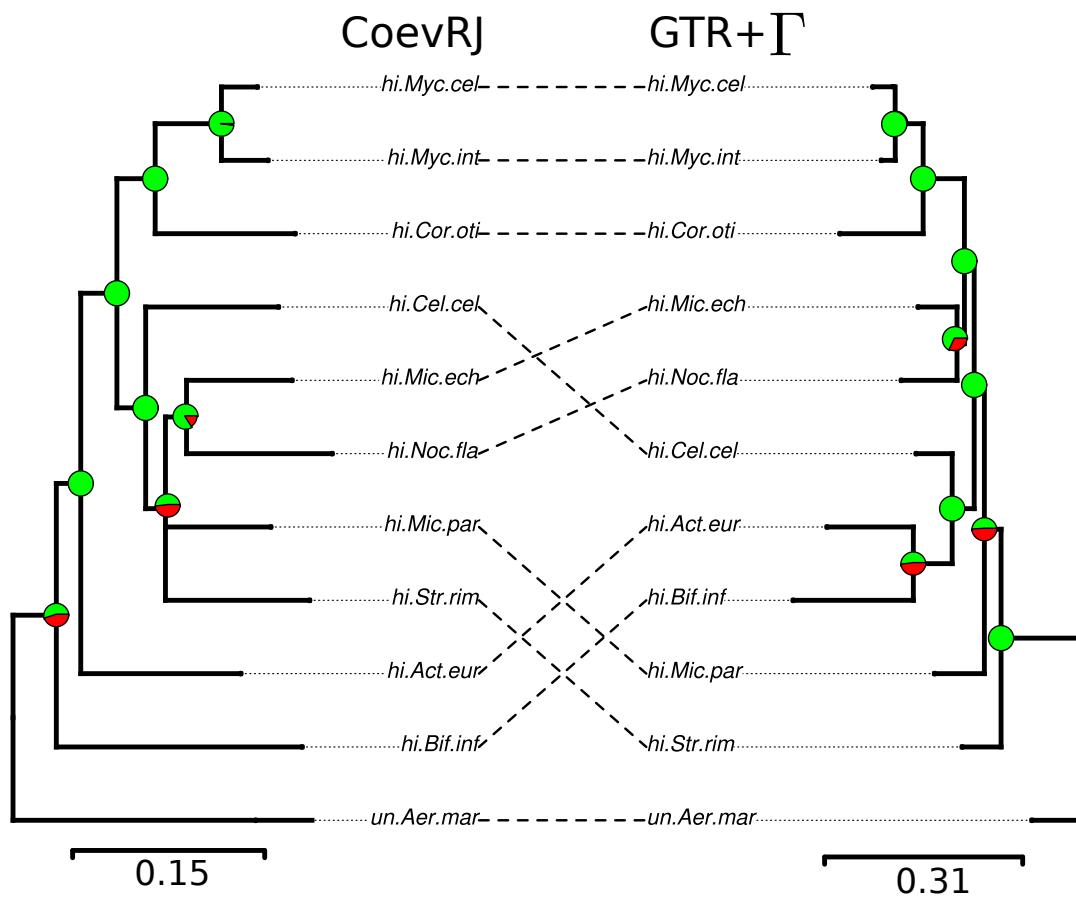

**Fig. S5.** Comparison of the phylogenetic trees inferred with CoevRJ and GTR+ $\Gamma$  for the Actinobacteria clade. The pie charts represent the inferred probability for each node to be present in the summarized phylogeny: a fully green pie chart identifies a node supported by a probability of 1.

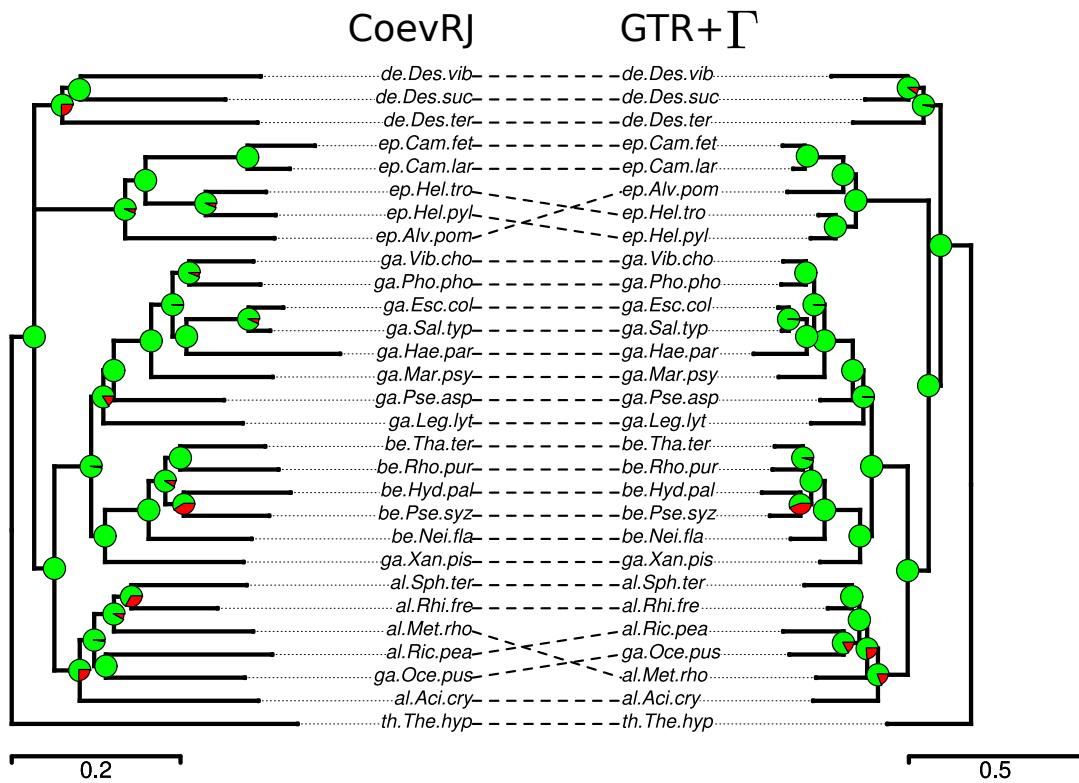

**Fig. S6.** Comparison of the phylogenetic trees inferred with CoevRJ and GTR+ $\Gamma$  for the Proteobacteria clade. The pie charts represent the inferred probability for each node to be present in the summarized phylogeny: a fully green pie chart identifies a node supported by a probability of 1.



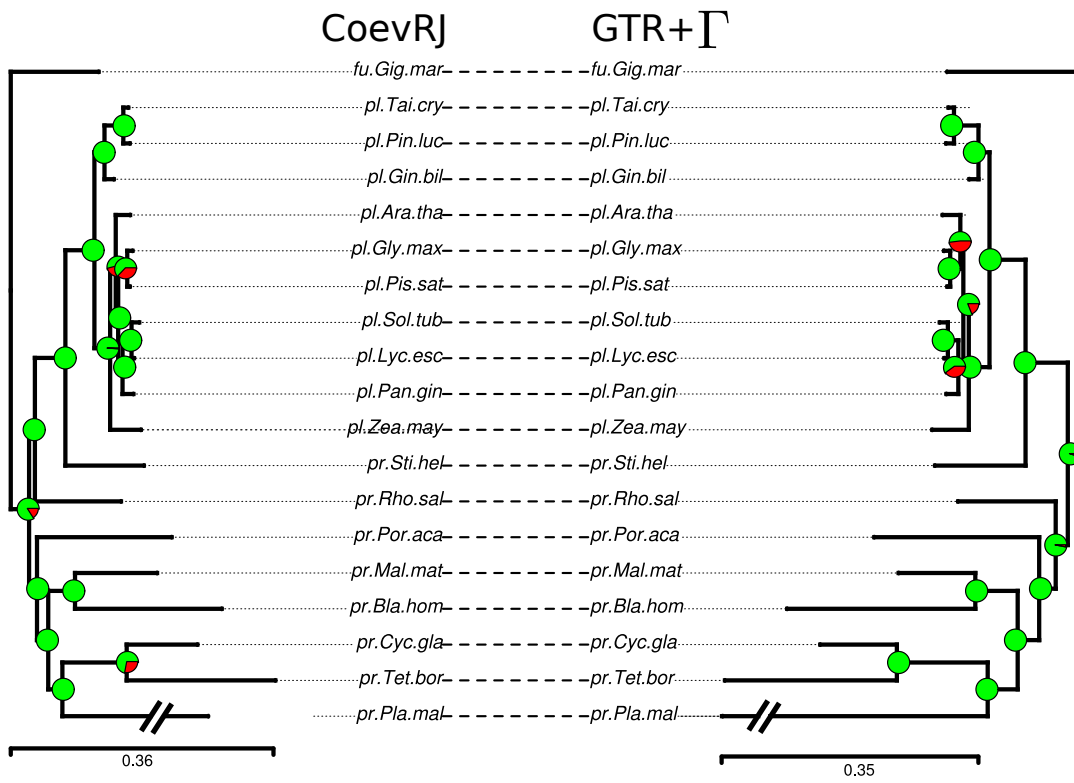

**Fig. S7.** Comparison of the phylogenetic trees inferred with CoevRJ and GTR+Γ for the plants and protists clade. The pie charts represent the inferred probability for each node to be present in the summarized phylogeny: a fully green pie chart identifies a node supported by a probability of 1.

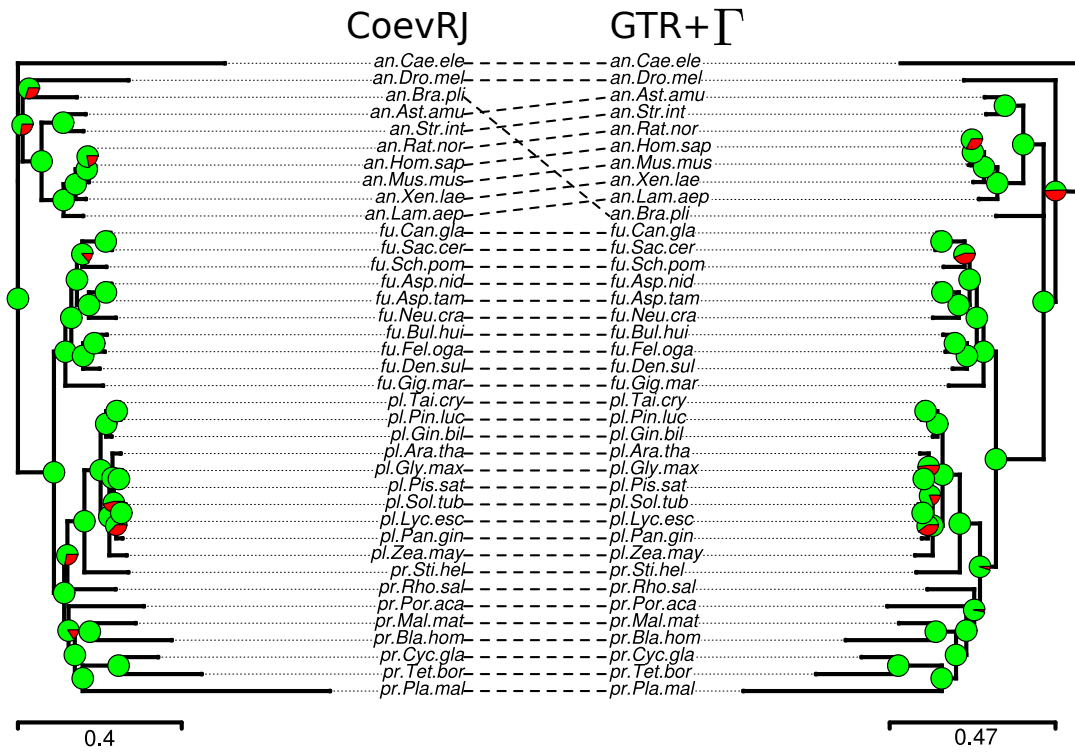

**Fig. S8.** Comparison of the phylogenetic trees inferred with CoevRJ and GTR+ $\Gamma$  for the Eukaryotes clade. The pie charts represent the inferred probability for each node to be present in the summarized phylogeny: a fully green pie chart identifies a node supported by a probability of 1.

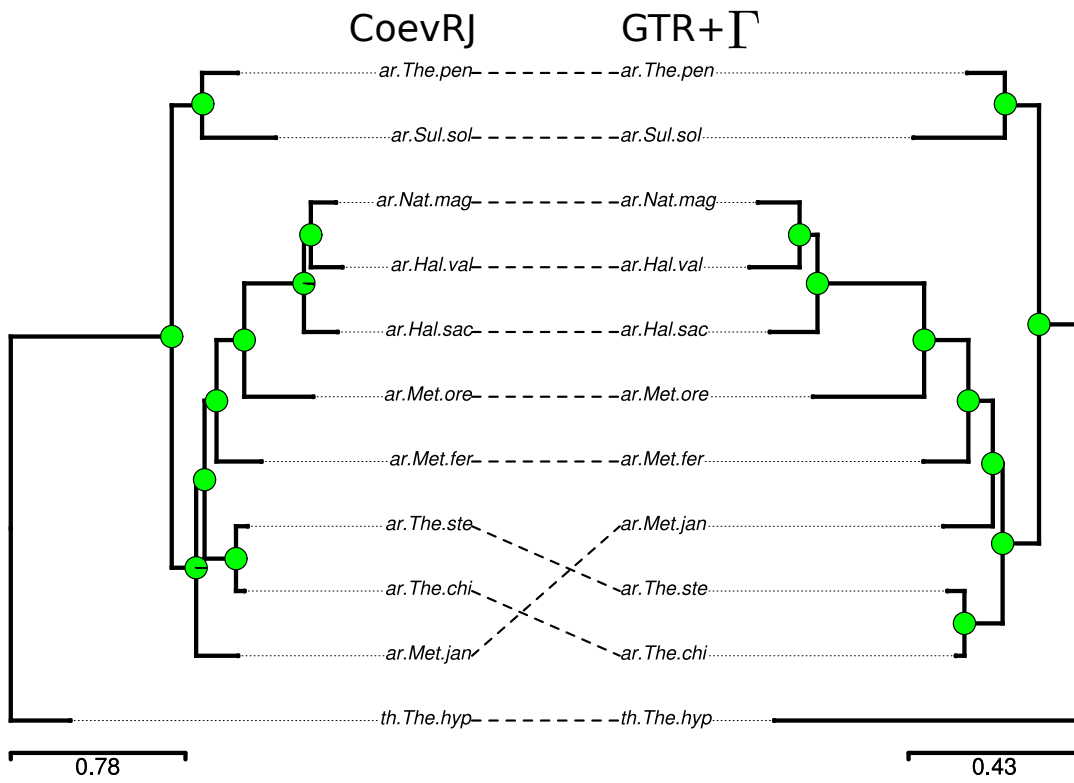

**Fig. S9.** Comparison of the phylogenetic trees inferred with CoevRJ and GTR+ $\Gamma$  for the Archea clade. The pie charts represent the inferred probability for each node to be present in the summarized phylogeny: a fully green pie chart identifies a node supported by a probability of 1.

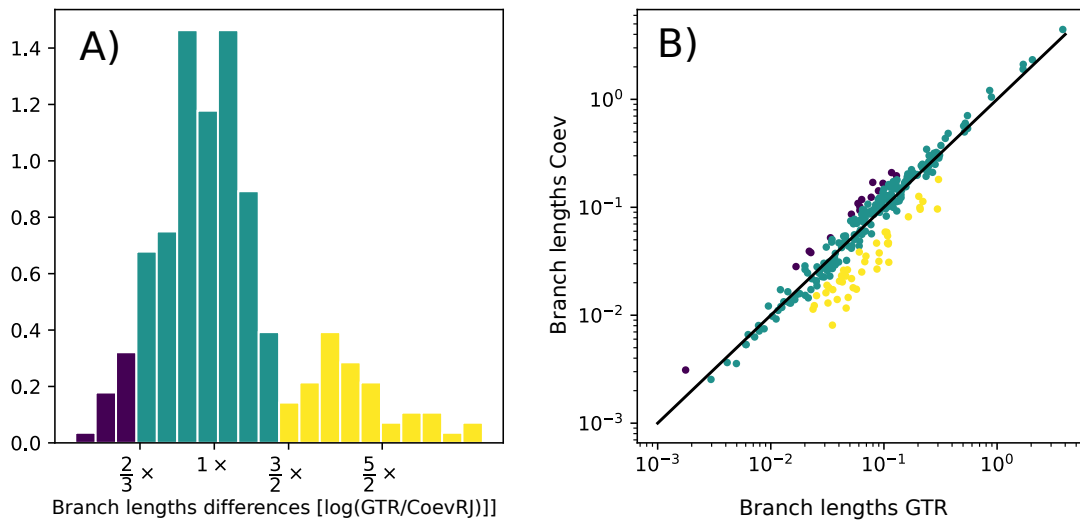

**Fig. S10.** Distribution of the branch lengths ratio between the consensus tree inferred under the GTR+ $\Gamma$  model and the CoevRJ model on the 16S rRNA dataset. Figure A) shows the histogram of the ratios where bins are colored according to the magnitude of these ratios. Violet bins represent branches that were inferred to be at least  $\frac{2}{3}$  smaller with the GTR+ $\Gamma$  model. Green bins are branches that are within a  $\frac{2}{3}$  to  $\frac{3}{2}$  ratios. Yellow bins represent branches that were inferred as at least  $\frac{3}{2}$  longer with the GTR+ $\Gamma$  model. Figure B) shows values of the branch lengths inferred under both models. Each point represents a pair of branch lengths that is colored according to Figure A) colors.

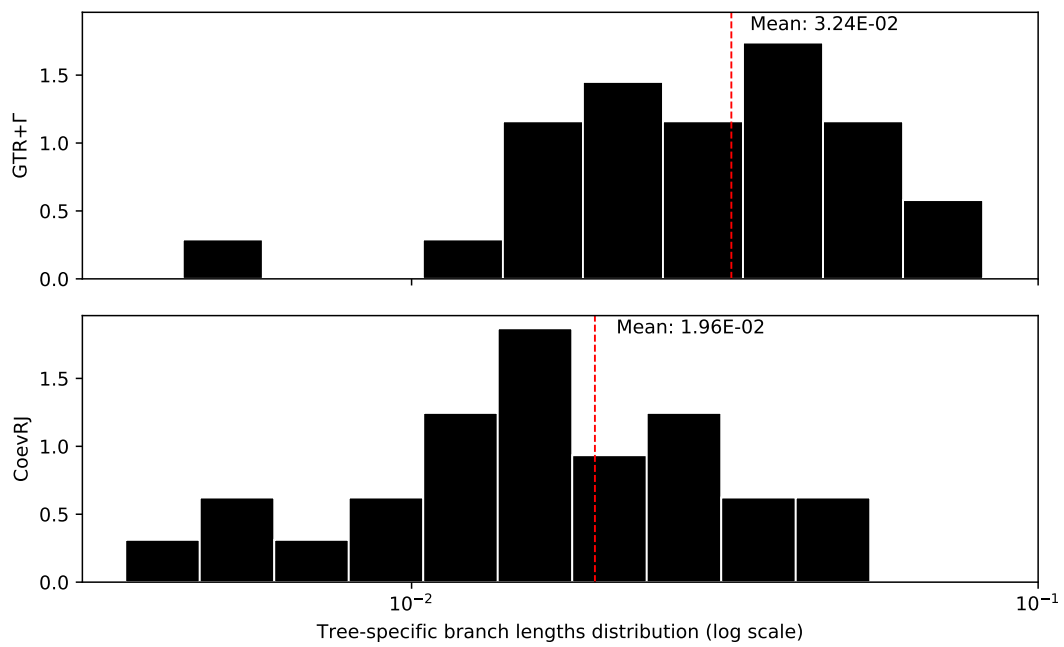

**Fig. S11.** Distributions of the inferred tree-specific branch lengths for the GTR+ $\Gamma$  and the CoevRJ models on the 16S rRNA dataset. Tree-specific branches are branches (or bipartitions) specific to one of the consensus trees.

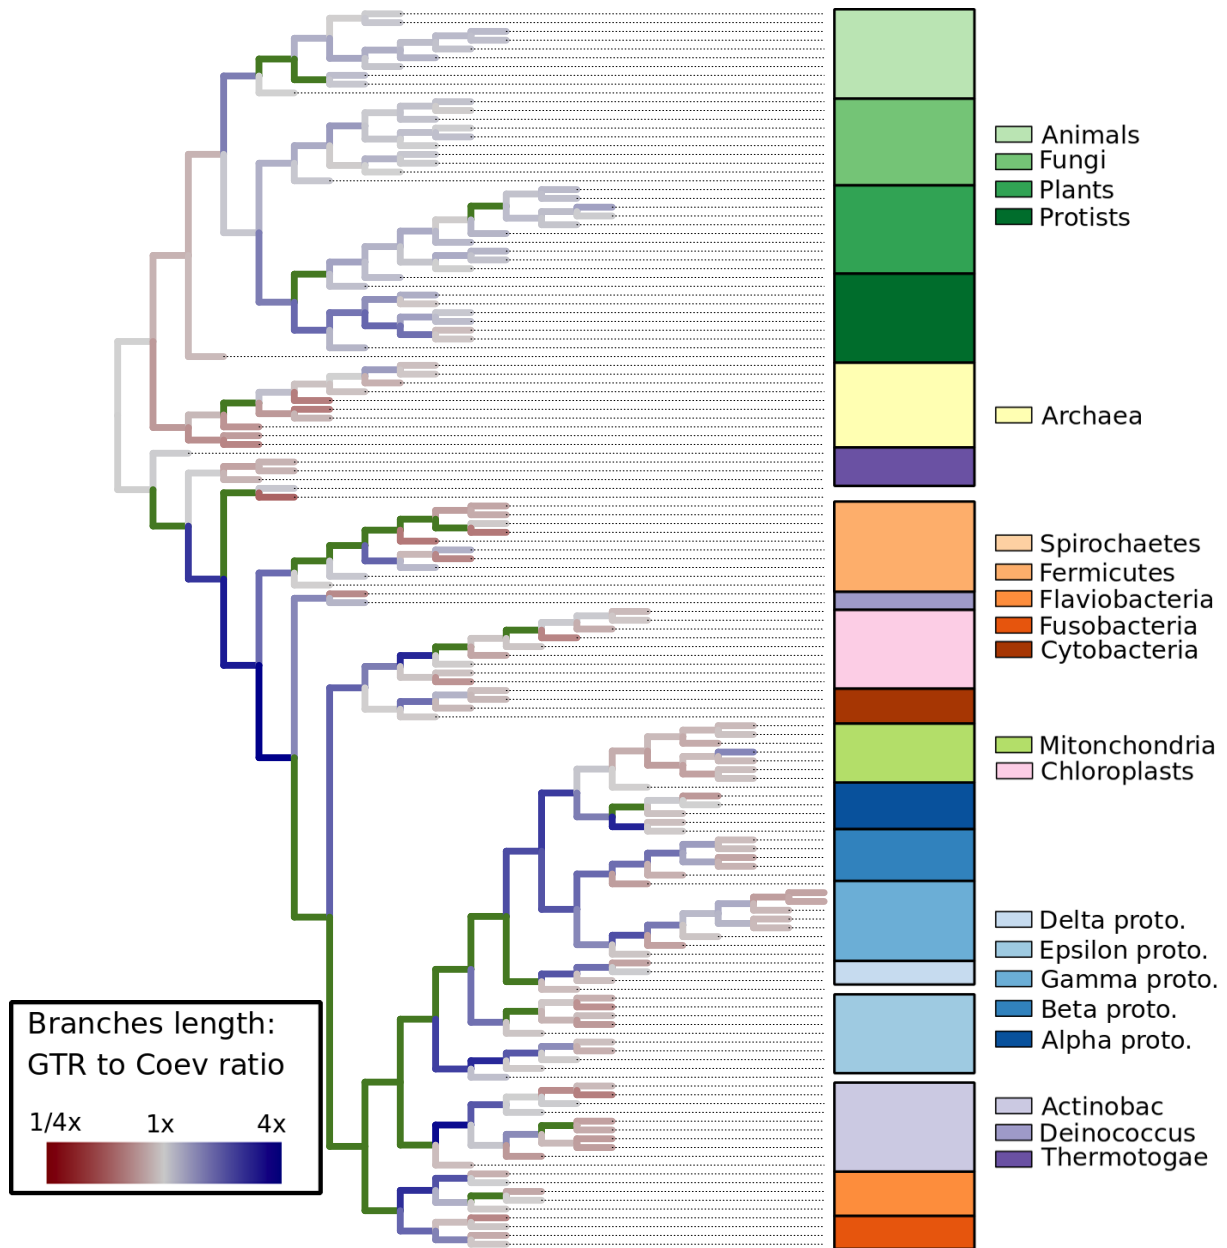

**Fig. S12.** Branch lengths ratios between the consensus tree inferred under the GTR+ $\Gamma$  model and the CoevRJ model on the 16S rRNA dataset. The phylogenetic tree represented is the consensus tree obtained under the CoevRJ model. Branches that are specific to this consensus tree, and therefore not directly comparable, are colored in green. Branches in shades of blue are inferred as smaller under the CoevRJ model (longer under the GTR+ $\Gamma$  model) and branches in shades of red are inferred as longer under the CoevRJ model (smaller under the GTR+ $\Gamma$  model).

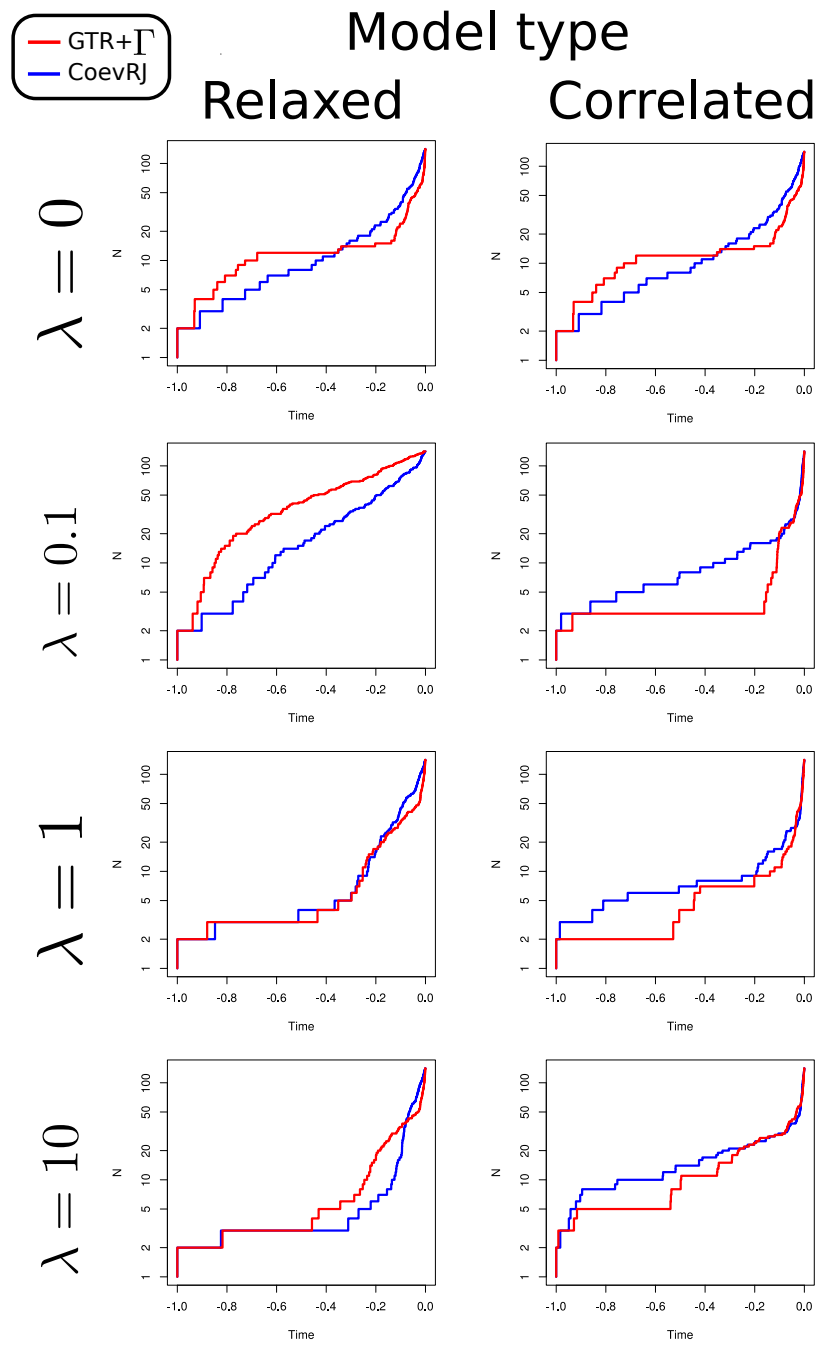

**Fig. S13.** Molecular dating of the phylogenetic tree inferred for the 16S ribosomal RNA. Lineages through time are reported for the *Relaxed* and *Correlated* penalized likelihood models with various parametrization for the  $\lambda$  parameter informing the strength with which the rate are constrained along branches.

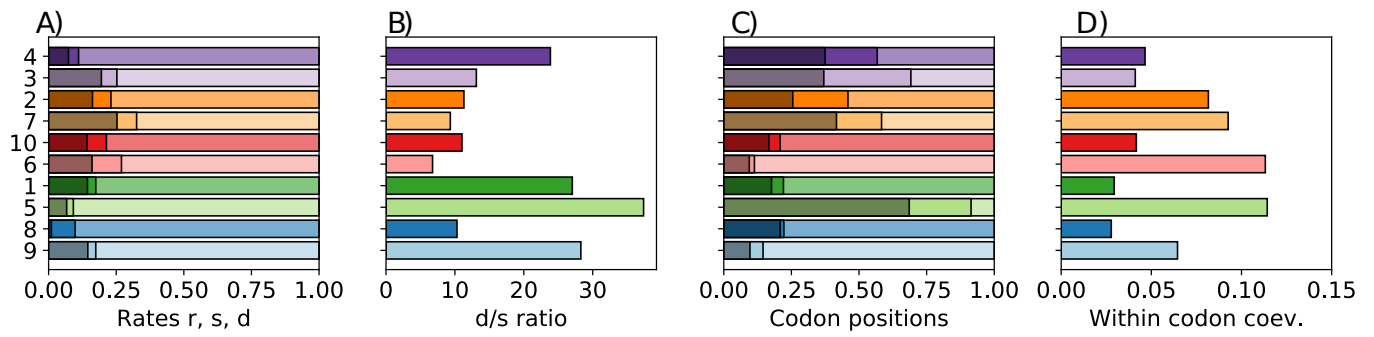

**Fig. S14.** Supplementary analysis for the 10 protein-coding genes identified by their assigned number on the left side of the figures. Figure A) shows the inferred rates ( $r, s, d$ ) with color shading identifying the rates : dark tint for rate  $r$ , normal tint for rate  $s$  and light tint for rate  $d$ . Figure B) reports the inferred  $d/s$  ratio. Figure C) reports the overall frequencies of the codon positions for sites inferred as coevolving with probability  $> 0.5$ . Darker, normal and lighter tints of the colors identifies the frequency of the first, second and third positions respectively (e.g. dataset 4 has 40%, 20%, 40% for positions 1,2,3 respectively). Figure D) shows the percentage of coevolving pairs whose sites were within the same codon.



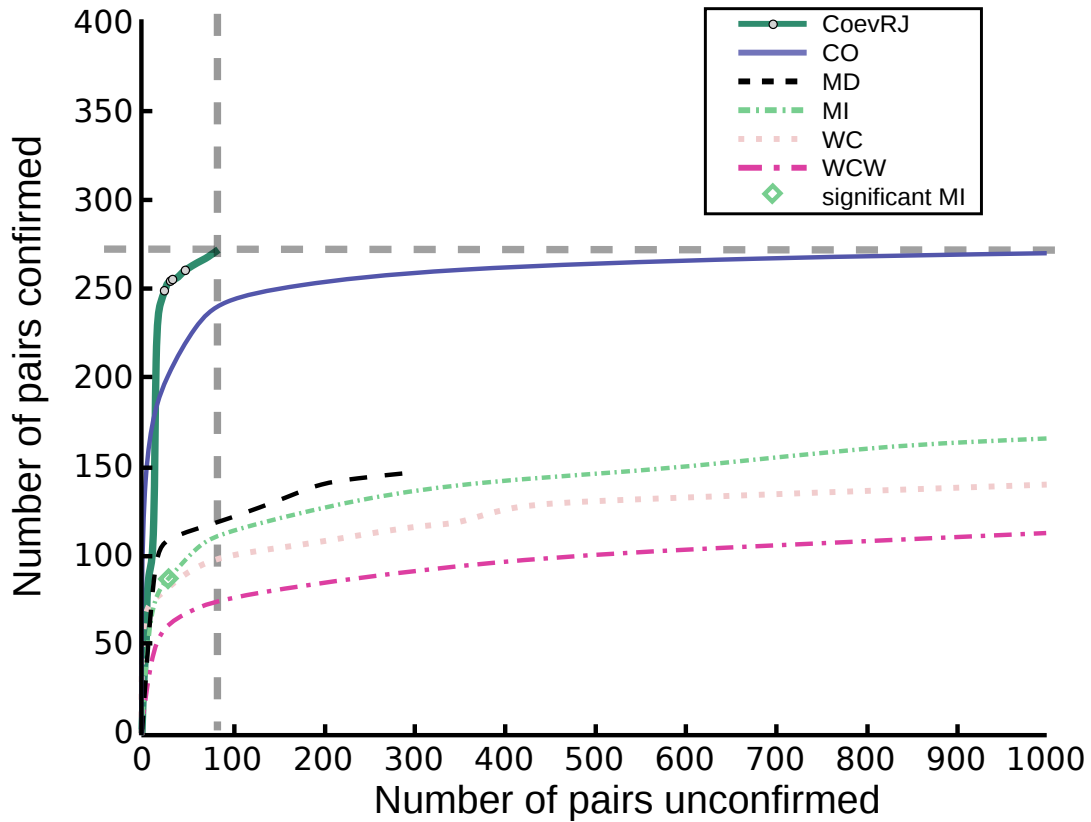

**Fig. S15.** Comparison of coevolution predictions on the 16S ribosomal RNA dataset for different methods and CoevRJ using the *E. Coli* structure. This figure reports the pairs unconfirmed by the structure against the ones confirmed (closely located on the structure). Pairs are ranked in function of the score returned by the method (posterior probability for CoevRJ). The threshold on the significance of the predicted pairs enables CoevRJ to report mostly confirmed pairs. In absence of such a threshold for the other methods, pairs predicted as coevolving are reported until the 1000th unconfirmed pairs is reached. This figure is based on results from Yeang et al. 2007 (1) in addition of the one from CoevRJ.

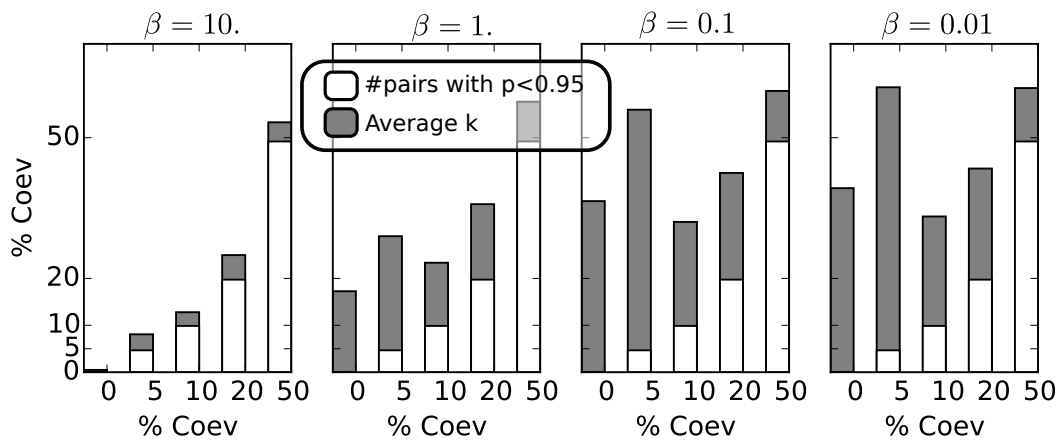

**Fig. S16.** Effects resulting from different parametrization of the hyperprior on  $k$ . Each grey bar represent the average of three  $k$  values inferred on simulated datasets. White bars represent the average number of correctly predicted pairs inferred with  $p > 0.95$  on these datasets.

47 **2. Supplementary Tables**

**Table S1. CoevRJ performance at predicting coevolving pairs on the simulated datasets. Only pairs inferred with probability > 0.95 are reported.**

| <b>% .</b>  | <b>Sensitivity</b> | <b>Specificity</b> | <b>Accuracy</b> | <b>PPV</b>   |
|-------------|--------------------|--------------------|-----------------|--------------|
| <b>Coev</b> | $TP/(TP+FN)$       | $TN/(TN+FP)$       | $(TP+TN)/All$   | $TP/(TP+FP)$ |
| 0%          | -                  | 1                  | 0.99            | -            |
| 5%          | 0.98               | 1                  | 1               | 1            |
| 10%         | 0.98               | 1                  | 1               | 1            |
| 25%         | 0.98               | 1                  | 1               | 1            |
| 50%         | 0.99               | 1                  | 1               | 1            |

**Table S2. Coevolving pairs inferred with  $p > 0.75$  having a distance greater than 6.5 Å on the *E.Coli* structure. Positions in bold are reported to have contact with proteins in the small ribosomal subunit (2). The name and the paired position in the protein are reported in the parentheses. Profiles annotated with a + have a pure Watson-Crick profile, pairs with a \* have a partial Watson-Crick profile and the reminder are fully not overlapping with Watson-Crick pairings.**

| E. Coli              |                        | Alignment |      | Pair Prob | Dist  | Profile       |
|----------------------|------------------------|-----------|------|-----------|-------|---------------|
| P1                   | P2                     | P1        | P2   | Prob      | Ang   |               |
| 204                  | 1336                   | 564       | 3467 | 1         | 177.2 | * AA,CT,GC    |
| 100                  | 1260                   | 243       | 3314 | 1         | 155.8 | × AT,TA       |
| <b>608</b> (S16-18)  | <b>1130</b> (S9-3)     | 1196      | 2564 | 1         | 143.4 | AA,TG,GT      |
| <b>609</b> (S16-18)  | <b>1125</b> (S10-5)    | 1197      | 2559 | 1         | 129.6 | × AT,CG,TA,GC |
| <b>588</b> (S8)      | <b>1289</b> (S7)       | 1172      | 3362 | 1         | 116.3 | TT,GA         |
| <b>618</b> (S16)     | 1166                   | 1249      | 3128 | 1         | 104.2 | * AA,CG,TT    |
| 330                  | 424                    | 721       | 842  | 1         | 78.3  | * AC,CG,TT    |
| <b>617</b> (S16-44)  | 1448                   | 1205      | 3593 | 1         | 73.6  | × AT,TA,GC    |
| <b>195</b> (S20-68)  | 622                    | 552       | 1253 | 1         | 61.2  | × AT,CG,GC    |
| 605                  | 1449                   | 1191      | 3594 | 1         | 60.5  | AA,CC,GT      |
| <b>1322</b> (S19-78) | <b>1371</b> (S9)       | 3451      | 3507 | 1         | 35.7  | AC,CG,GT      |
| <b>597</b> (S8-94)   | 651                    | 1182      | 1332 | 1         | 22.3  | * AA,GC       |
| <b>619</b> (S4-134)  | 623                    | 1250      | 1292 | 1         | 10.0  | AG,CA,TC,GT   |
| 202                  | 464                    | 560       | 981  | 1         | 6.6   | * AA,CG,TC,GT |
| 292                  | <b>1525</b> (S11-120)  | 681       | 3749 | 0.999     | 60.0  | AA,GG         |
| <b>428</b> (S4-10)   | 1261                   | 848       | 3315 | 0.997     | 89.2  | TT,GA         |
| 937                  | <b>1248</b> (S16-1229) | 2288      | 3230 | 0.995     | 34.8  | AA,CT         |
| 80                   | 845                    | 116       | 2173 | 0.891     | 166.6 | TA,GG         |
| 462                  | <b>705</b> (S11)       | 933       | 1853 | 0.891     | 153.0 | AC,CA,TT,GG   |
| 1025                 | 1036                   | 2417      | 2449 | 0.891     | 8.9   | * AC,CG,TA,GT |
| 621                  | <b>642</b> (S8-113)    | 1252      | 1322 | 0.889     | 50.7  | AA,CC,TT,GG   |
| <b>541</b> (S4-42)   | <b>1148</b> (S9-16)    | 1118      | 3094 | 0.768     | 87.3  | AA,TC,GT      |
| 173                  | <b>587</b> (S8-92)     | 351       | 1165 | 0.763     | 77.5  | AA,TG,GT      |

**Table S3. Eukaryotes datasets from Ensembl/Selectome.**

| Id | Name                  | Annotation                              | # Seq | Length | Filtered Length |
|----|-----------------------|-----------------------------------------|-------|--------|-----------------|
| 1  | ENSGT00390000004753.1 | Ribosomal Protein L7a                   | 88    | 805    | 796             |
| 2  | ENSGT00550000074423.1 | Olfactory receptor 507                  | 256   | 1111   | 709             |
| 3  | ENSGT00600000084009.1 | Olfactory receptor family 8 subfamily D | 336   | 1126   | 883             |
| 4  | ENSGT00600000084235.1 | Protocadherin beta 4                    | 195   | 2674   | 2116            |
| 5  | ENSGT00620000087601.2 | Bone Morphogenetic Protein              | 157   | 1954   | 907             |
| 6  | ENSGT00660000095099.1 | Actg2 (actin, gamma 2)                  | 160   | 1132   | 1120            |
| 7  | ENSGT00660000095126.1 | Olfactory receptor family 6 subfamily C | 315   | 997    | 928             |
| 8  | ENSGT00660000095289.1 | Tubulin Beta 3 Class III                | 111   | 1336   | 1321            |
| 9  | ENSGT00670000097815.3 | Elongation factor1-alpha1               | 86    | 1387   | 1387            |
| 10 | ENSGT00680000099543.3 | Tubulin, alpha 1A                       | 192   | 1720   | 976             |

**Table S4. Values employed for the priors on the rates defining the Coev  $Q$  matrices.**

| Default prior |                |                     | Empirical prior |                |                     |
|---------------|----------------|---------------------|-----------------|----------------|---------------------|
| $i$           | $\mu_{\psi_i}$ | $\sigma_{\psi_i}^2$ | $i$             | $\mu_{\psi_i}$ | $\sigma_{\psi_i}^2$ |
| 1             | 0              | 0.25                | 1               | 0.26           | 0.37                |
| 3             | 3.5            | 0.25                | 3               | 3.13           | 0.66                |

### 48 3. Supplementary Algorithm

---

**Algorithm 1** Score algorithm for the proposal of pairs.

---

```
1: for all Possible unique pairs  $(i, j) \in N \times N$  do
2:    $\Phi \leftarrow$  Possible profiles given  $X_i$  and  $X_j$ 
3:    $\chi \leftarrow$  Conflict count for each profile  $\phi \in \Phi$ 
4:    $\phi_{best} \leftarrow \operatorname{argmin}_{\phi \in \Phi} (\chi(\phi))$ 
5:    $\sigma_{best}^2 \leftarrow$  variance of observed pairs count within profile  $\phi_{best}$ 
6:    $S1 \leftarrow |\Phi|$ 
7:    $S2 \leftarrow |\chi(\phi_{best})|$ 
8:    $S3 \leftarrow \sigma_{best}^2$ 
9:    $S1', S2', S3' \leftarrow \operatorname{normalize}(S1, S2, S3)$ 
10:   $S(i, j) \leftarrow \prod_{i=1}^3 (S_i')^{w_i}$ 
11:   $R(A, B, \phi) \leftarrow \frac{\chi(\phi)}{\sum_{\phi \in \Phi} \chi(\phi)}$ 
return  $S(\cdot, \cdot), R(\cdot, \cdot, \cdot)$ 
```

---

### 49 References

- 50 1. Yeang CH, Darot JFJ, Noller HF, Haussler D (2007) Detecting the Coevolution of Biosequences—An Example of RNA  
51 Interaction Prediction. *Molecular Biology and Evolution* 24(9):2119–2131.
- 52 2. Cannone JJ, et al. (2002) The Comparative RNA Web (CRW) Site: an online database of comparative sequence and  
53 structure information for ribosomal, intron, and other RNAs. *BMC Bioinformatics* 3:2.
